# Supplementary material for: Ribosomal protein QM/RPL10 positively regulates defence and protein translation mechanisms during nonhost disease resistance
Source: PubMed Central journal article supplement — Mol Plant Pathol. 2020 Sep 22;21(11):1481–94. doi: 10.1111/mpp.12991 (PMC7548997; doi:10.1111/mpp.12991), 2020-09-22
Supplement: MPP-21-1481-s002.pdf [file MPP-21-1481-s002.pdf]

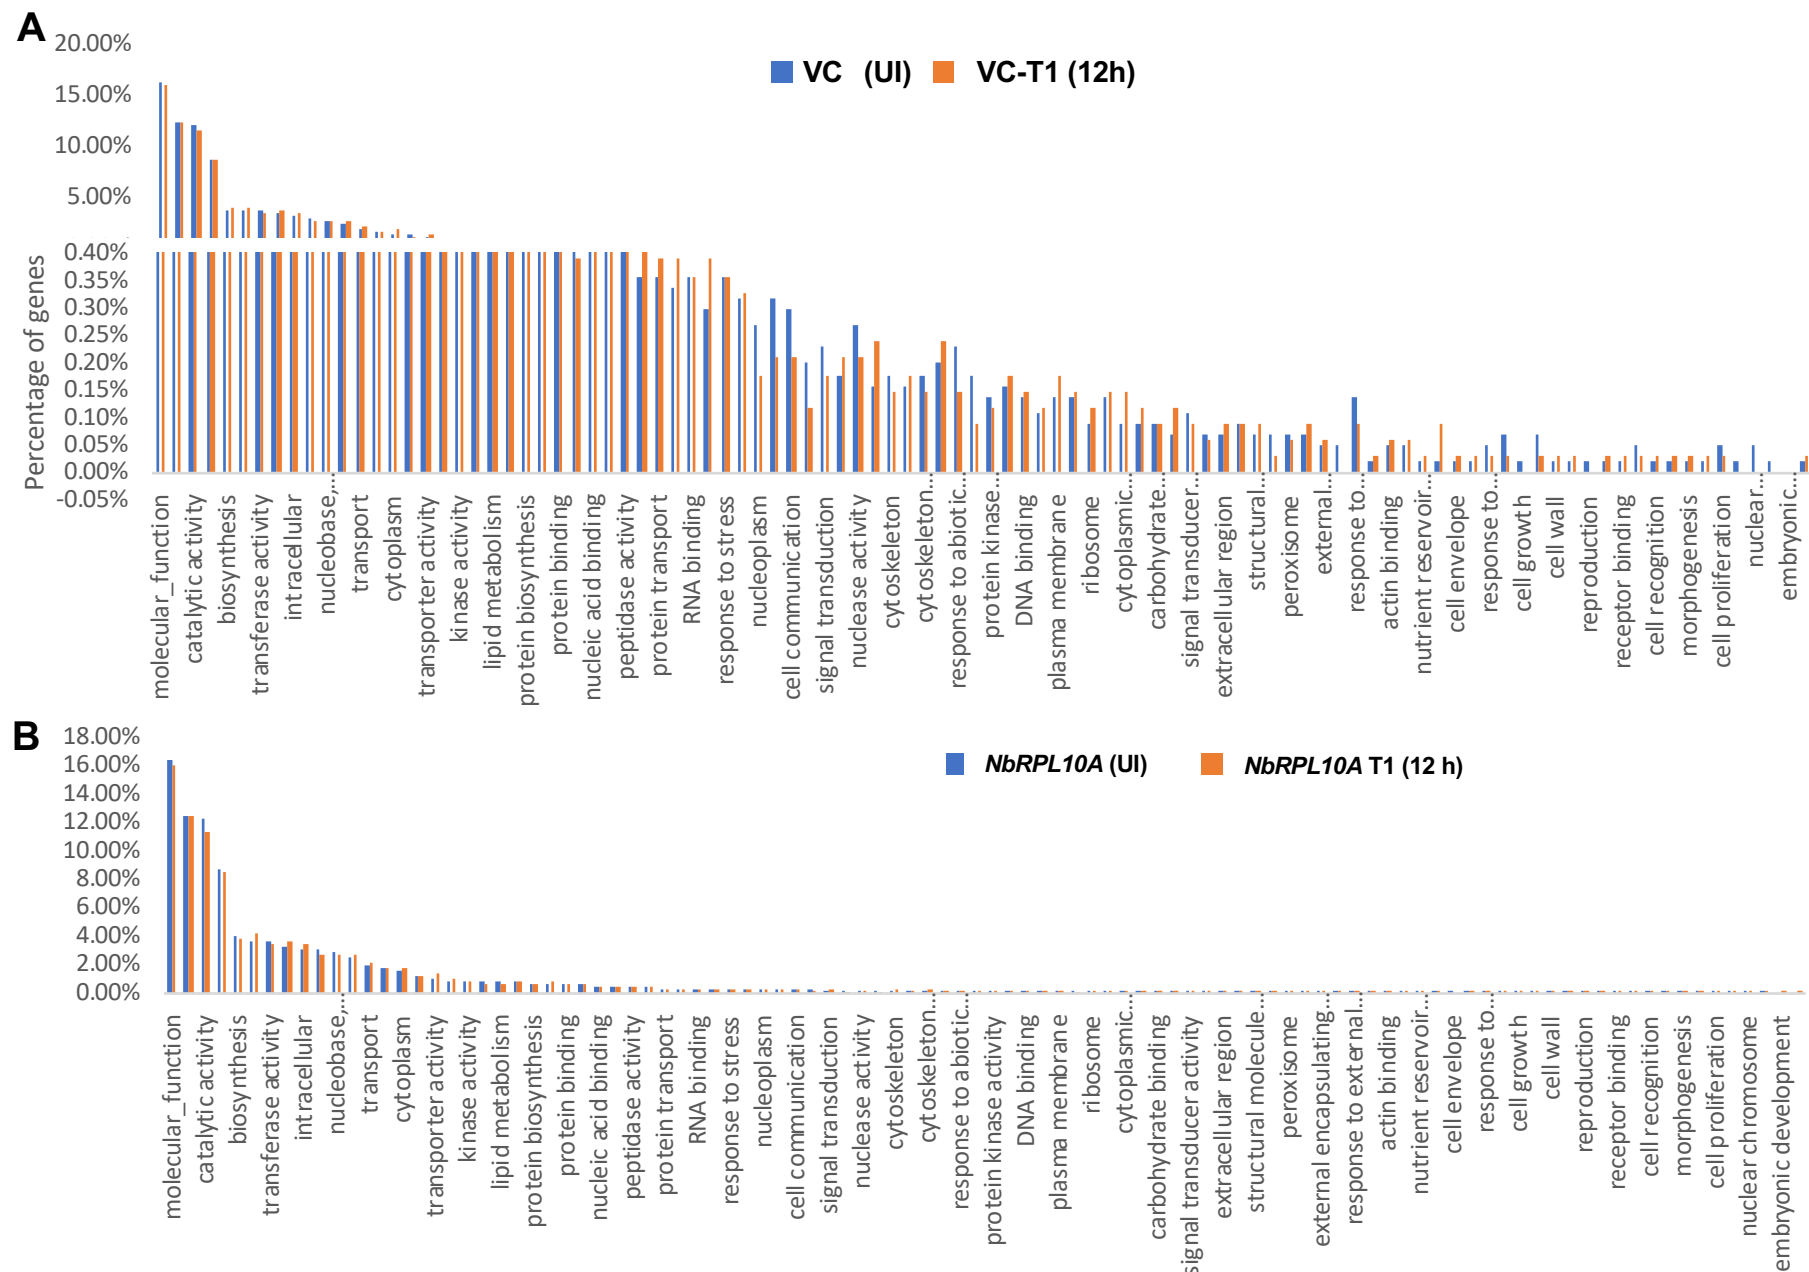

**Fig. S2-** Classification of differentially expressed genes (DEGs) from the *NbRPL10A* silenced plants. (A) DEGs in uninfected (UI) vector control (VC) samples when compared to 12 hours after infection with nonhost pathogen *P. syringae* pv. tomato T1 (T1) (B) DEGs in uninfected *NbRPL10A* silenced plants when compared to *NbRPL10A* silenced plants treated with nonhost pathogen *Pseudomonas syringae* pv. tomato T1. The genes were classified using agriGO functional annotation model (<http://bioinfo.cau.edu.cn/agriGO/>).
