# Supplementary material for: Ribosomal protein QM/RPL10 positively regulates defence and protein translation mechanisms during nonhost disease resistance
Source: PubMed Central journal article supplement — Mol Plant Pathol. 2020 Sep 22;21(11):1481–94. doi: 10.1111/mpp.12991 (PMC7548997; doi:10.1111/mpp.12991), 2020-09-22
Supplement: MPP-21-1481-s004.pdf [file MPP-21-1481-s004.pdf]

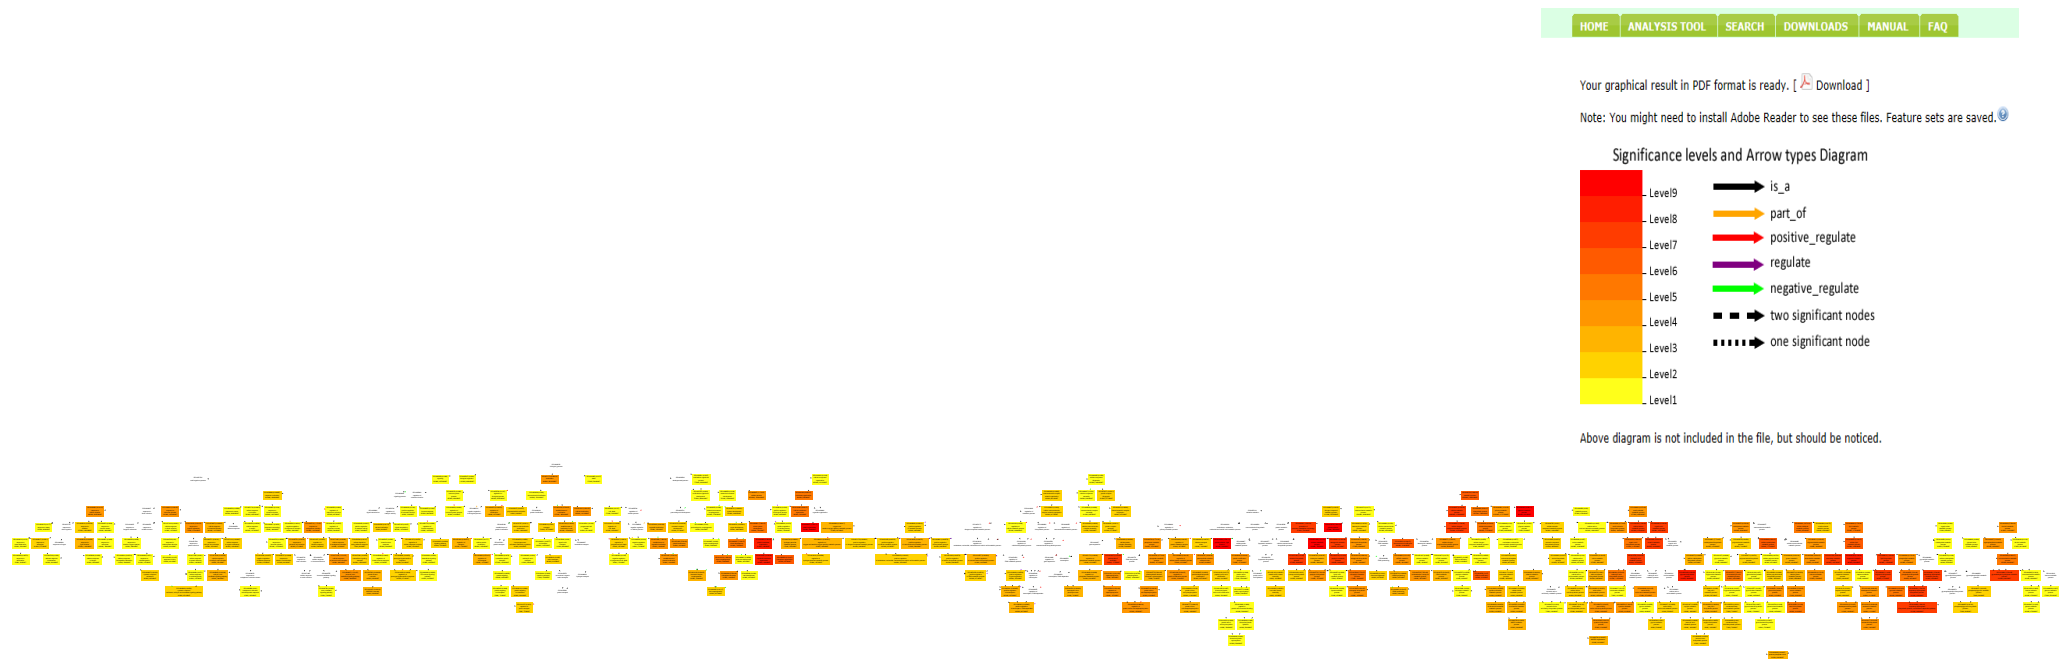

**Fig. S4.** Gene ontology (GO) analysis of upregulated genes in *NbRPL10A*-silenced samples when compared to vector control (VC) samples without any pathogen treatment. The differentially expressed genes from RNA seq data of *N. benthamiana* were used for BLAST analysis to find Arabidopsis homologs and the unigenes from Arabidopsis were submitted to pathway analysis using agriGO analysis tool (<http://bioinfo.cau.edu.cn/agriGO/>).
