# Supplementary material for: Ribosomal protein QM/RPL10 positively regulates defence and protein translation mechanisms during nonhost disease resistance
Source: PubMed Central journal article supplement — Mol Plant Pathol. 2020 Sep 22;21(11):1481–94. doi: 10.1111/mpp.12991 (PMC7548997; doi:10.1111/mpp.12991), 2020-09-22
Supplement: MPP-21-1481-s007.pdf [file MPP-21-1481-s007.pdf]

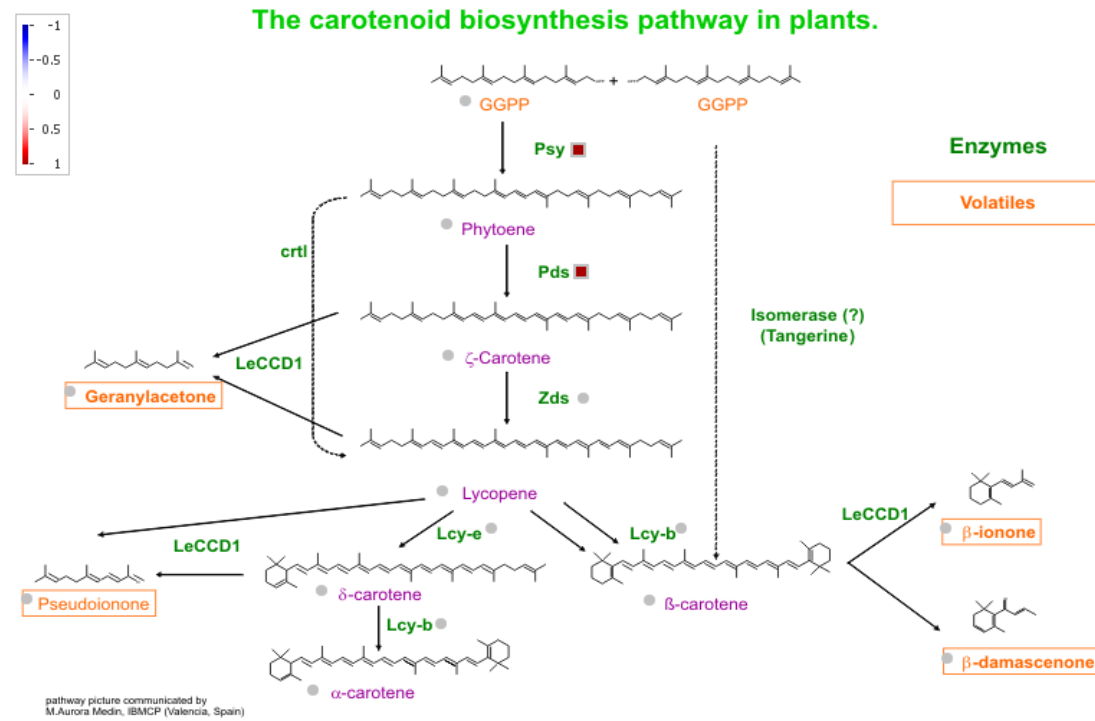

**Fig. S7.** Differentially expressed genes of carotenoid biosynthetic pathway in *NbRPL10A* silenced plants without any pathogen infection. Downregulation of carotenoid biosynthesis genes *phytoene synthase (Psy)* and *phytoene desaturase (Pds)* genes in *NbRPL10A* silenced plants. The pathway was generated through MapMan gene mapping tool.
