# Supplementary material for: Ribosomal protein QM/RPL10 positively regulates defence and protein translation mechanisms during nonhost disease resistance
Source: PubMed Central journal article supplement — Mol Plant Pathol. 2020 Sep 22;21(11):1481–94. doi: 10.1111/mpp.12991 (PMC7548997; doi:10.1111/mpp.12991), 2020-09-22
Supplement: MPP-21-1481-s008.pdf [file MPP-21-1481-s008.pdf]

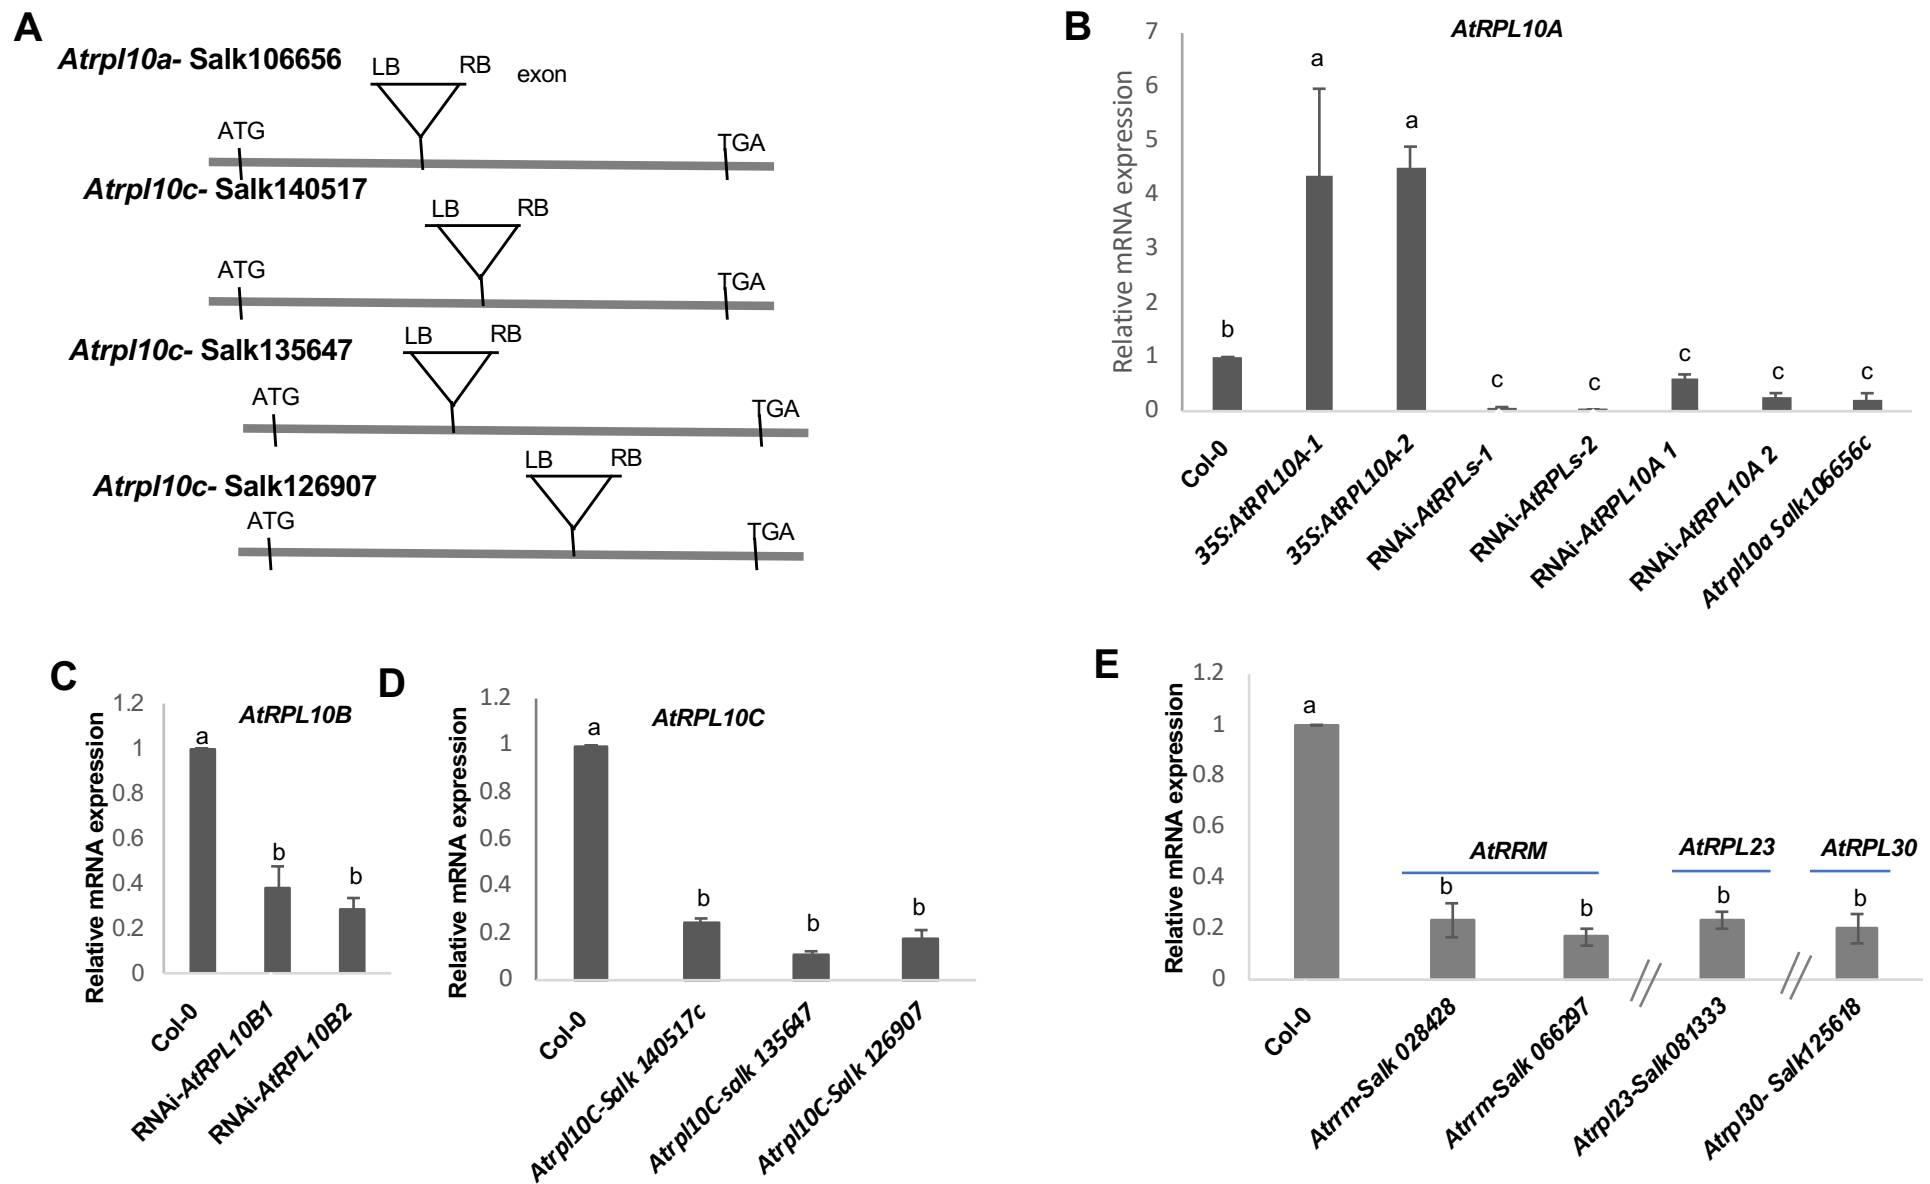

**Fig. S8.** Molecular characterization of Arabidopsis *AtRPL10A* overexpression, *Atrpl10* mutants and *AtRPL10A* RNAi plants. (A) Genetic map showing the T-DNA insertion sites in *rpl10a* (*AtRPL10A-At1g14320*) & *rpl10c* (*AtRPL10C-At1g66580*) mutants. *rpl10b* (*AtRPL10B-At1g26910*) mutants were lethal and therefore RNAi lines were developed. (B) Expression of *AtRPL10A* in overexpression, RNAi and *Atrpl10a* mutant plants using RT-qPCR, (C) Expression of *AtRPL10B* in RNAi lines. (D) Expression of *AtRPL10C* in *Atrpl10c* mutants. (E) Expression of *AtRRM*, *AtRPL23* and *AtRPL30* in their respective mutants. Error bars indicate standard deviation for a minimum of three biological replicates.
