# Supplementary material for: Ribosomal protein QM/RPL10 positively regulates defence and protein translation mechanisms during nonhost disease resistance
Source: PubMed Central journal article supplement — Mol Plant Pathol. 2020 Sep 22;21(11):1481–94. doi: 10.1111/mpp.12991 (PMC7548997; doi:10.1111/mpp.12991), 2020-09-22
Supplement: MPP-21-1481-s009.pdf [file MPP-21-1481-s009.pdf]

**A Functional categorization by loci: Go cellular component N=50**

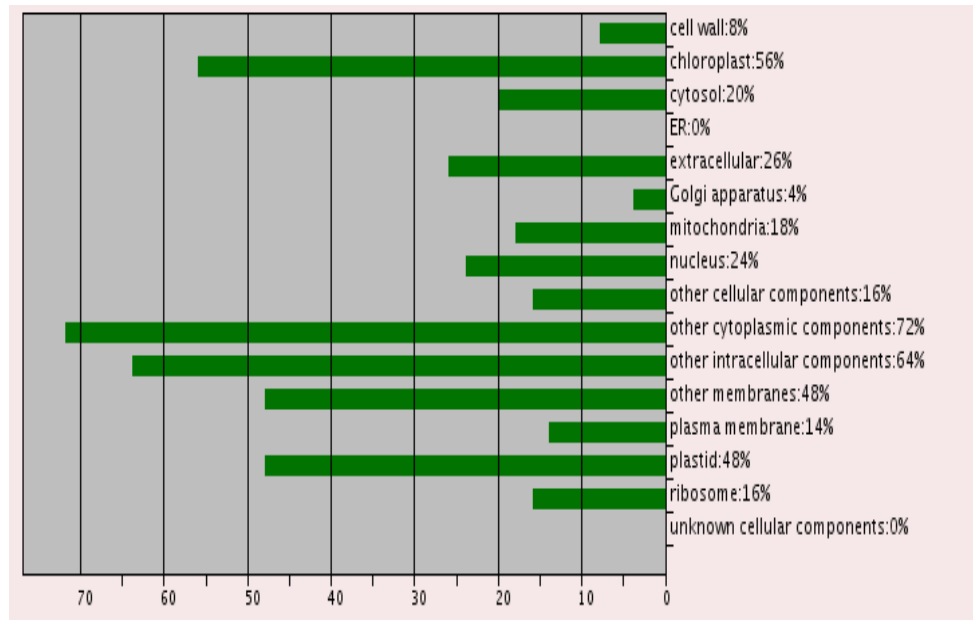

**B Functional categorization by annotation: Go Molecular function**

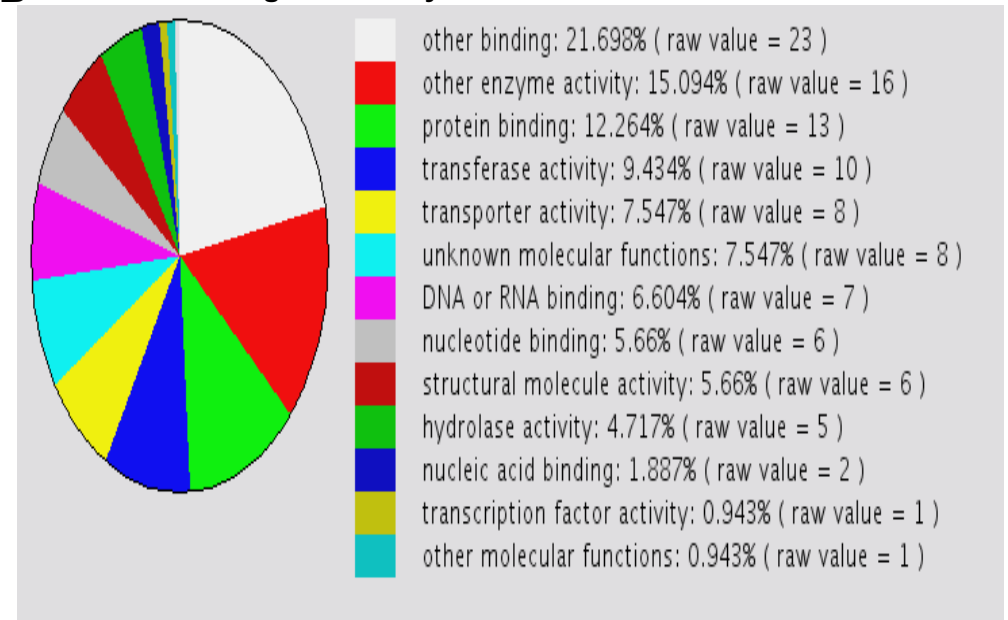

**Fig. S9.** Classification of different proteins identified in a yeast two hybrid screen that putatively interact with AtRPL10A. (A) Categorization of genes based on cellular component distribution and (B) Molecular function using Panther analysis (<http://pantherdb.org>). The detailed list is presented in Table S2
