# Supplementary material for: Ribosomal protein QM/RPL10 positively regulates defence and protein translation mechanisms during nonhost disease resistance
Source: PubMed Central journal article supplement — Mol Plant Pathol. 2020 Sep 22;21(11):1481–94. doi: 10.1111/mpp.12991 (PMC7548997; doi:10.1111/mpp.12991), 2020-09-22
Supplement: MPP-21-1481-s010.pdf [file MPP-21-1481-s010.pdf]

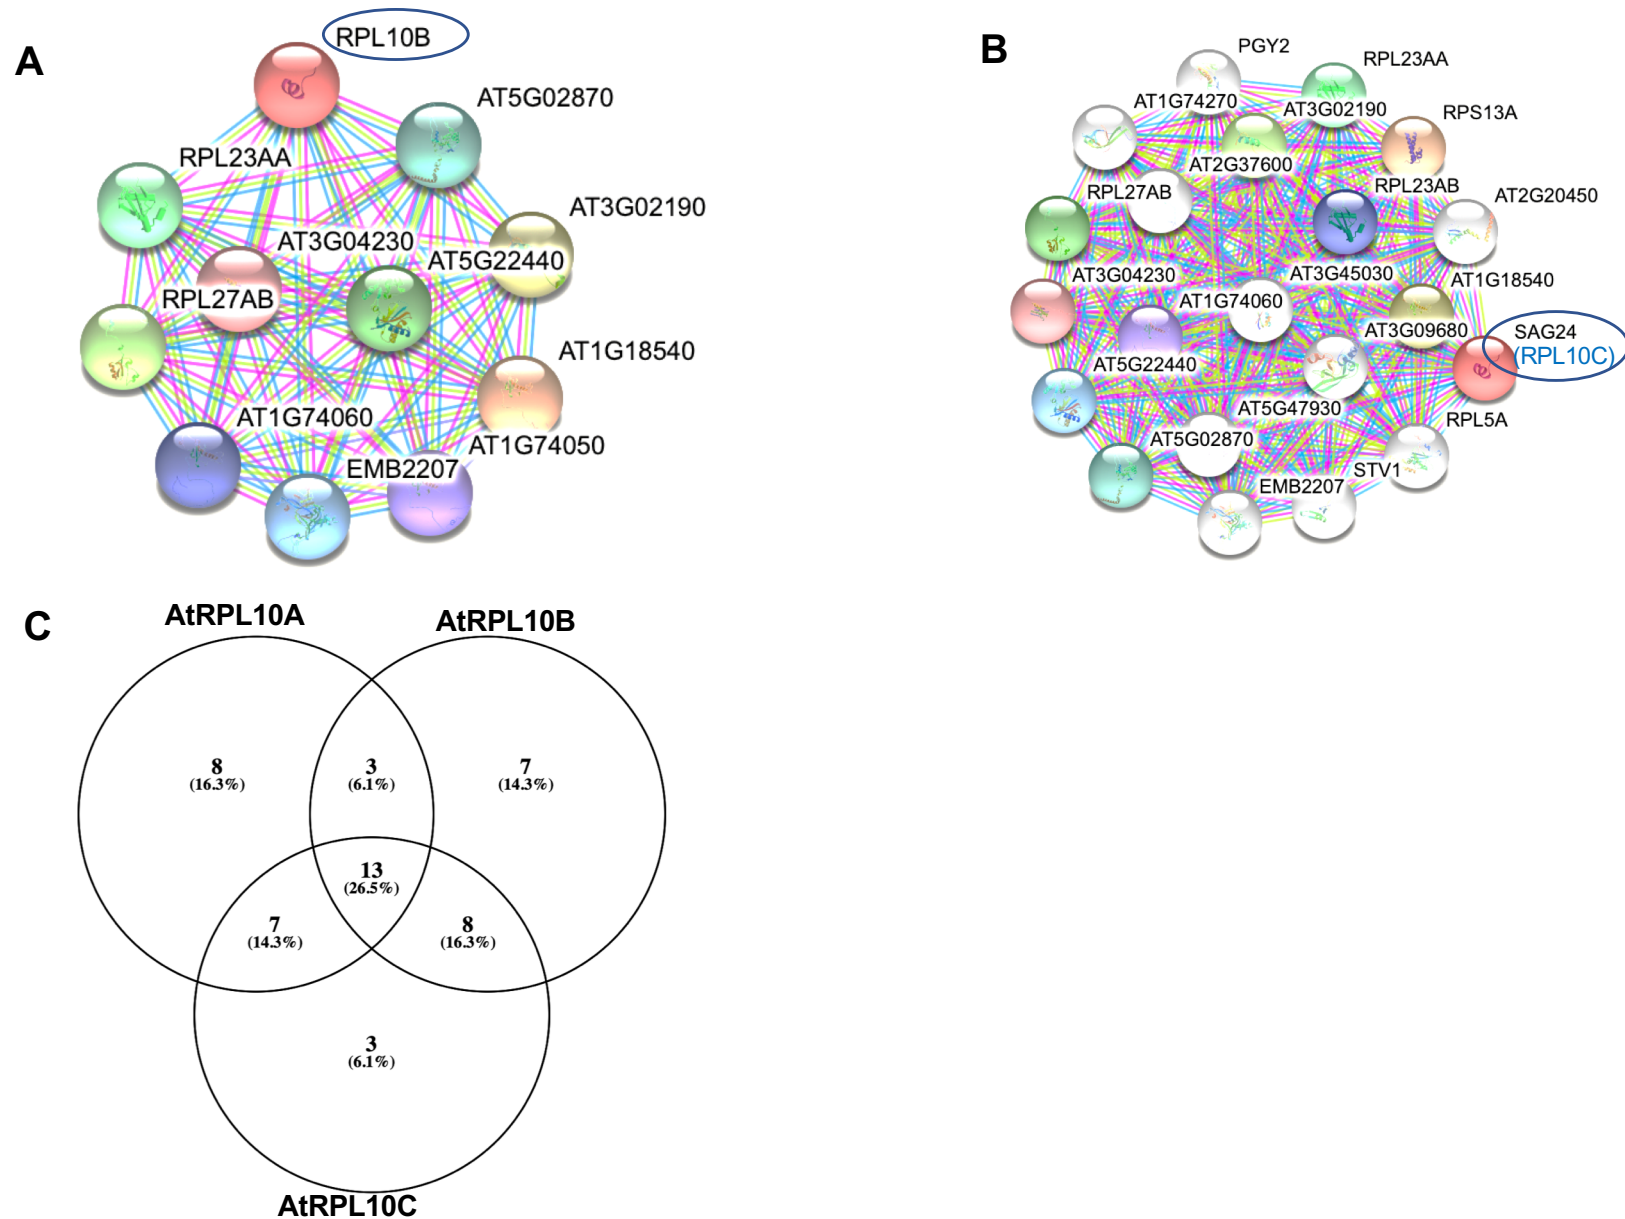

**Fig. S10.** *In silico* Prediction of AtRPL10A, AtRPL10B and AtRPL10C interacting proteins. (A) AtRPL10 interacting protein network. (B) AtRPL10C interacting protein network. The interactions were predicted using STRING bioinformatic tool (<https://string-db.org>). (C) Venn diagram showing the common and unique proteins that putatively interacts with specific RPL10 proteins. The common and unique proteins were sorted using VENNY 2.1 and the detailed list is presented in Table S3.
